# Supplementary material for: A Role for p53 in the Adaptation to Glutamine Starvation through the Expression of SLC1A3
Source: PubMed Central journal article supplement (PMC6224545; doi:10.1016/j.cmet.2018.07.005), 2018-11-06
Supplement: mmc1.pdf [file mmc1.pdf]

**Cell Metabolism, Volume 28**

**Supplemental Information**

**A Role for p53 in the Adaptation to Glutamine**

**Starvation through the Expression of SLC1A3**

**Mylène Tajan, Andreas K. Hock, Julianna Blagih, Neil A. Robertson, Christiaan F. Labuschagne, Flore Kruiswijk, Timothy J. Humpton, Peter D. Adams, and Karen H. Vousden**

A

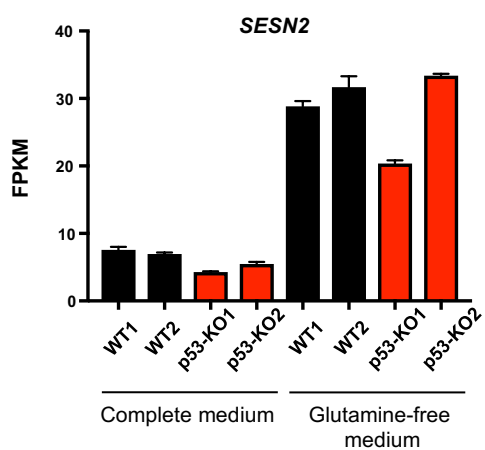

B

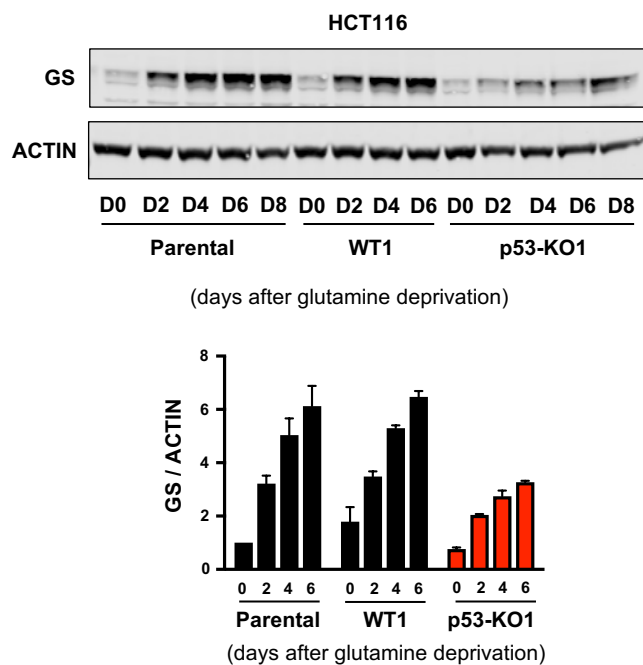

C

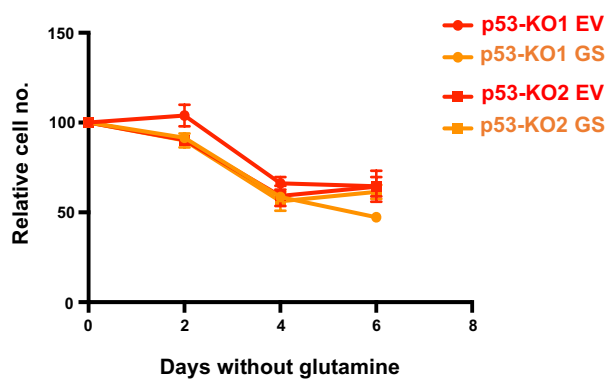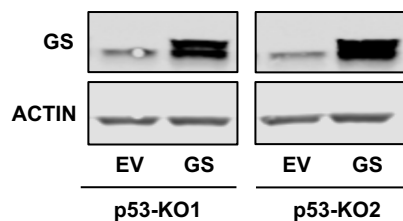

D

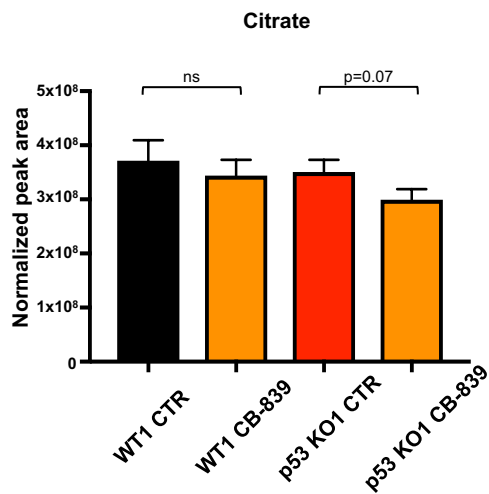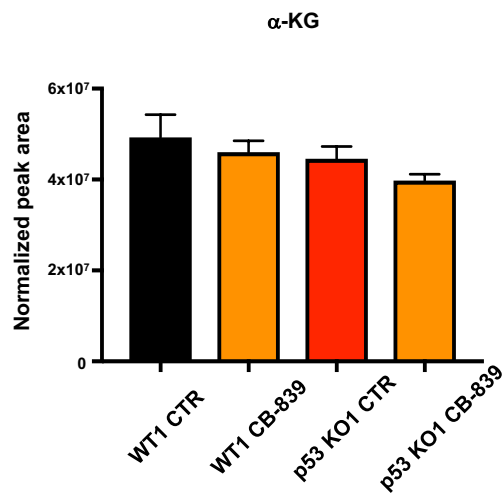

**Figure S1 (related to Figure 2): Response of p53 wild type and null cells to glutamine starvation or glutaminase inhibition.**

- A. Transcriptional expression of *SESN2* in HCT116 WT and p53-null clones grown for 2 days in complete medium or in glutamine-free medium. Data are presented as mean  $\pm$  SEM (averages of triplicate wells).
- B. Western blot analysis demonstrating glutamine synthetase (GS) expression in parental, WT or p53-null clone cultured for 0, 2, 4, 6 or 8 days in glutamine-free condition. Westerns blots from three independent experiments were quantified (bottom). Data are presented as mean  $\pm$  SEM.
- C. p53-null cells infected with a control vector or a vector encoding for GS were grown in glutamine-free medium for 6 days and counted every 2 days (left panel). Data are presented as mean  $\pm$  SEM of one representative experiment (averages of triplicate wells). Western blot shows stable overexpression of GS in p53-null cells (right panel).
- D. Metabolites were extracted from the tumours derived from HCT116 WT1 or p53 KO1 xenografts 4 hours after the final gavage of the nude mice with vehicle (CTR) ( $n = 7$  for WT1;  $n = 7$  for p53 KO1) or CB-839 ( $n = 8$  for WT1;  $n = 8$  for p53 KO1) and normalized to the tumor extract mass. Data are presented as mean  $\pm$  SEM. (Mann-Whitney nonparametric test).

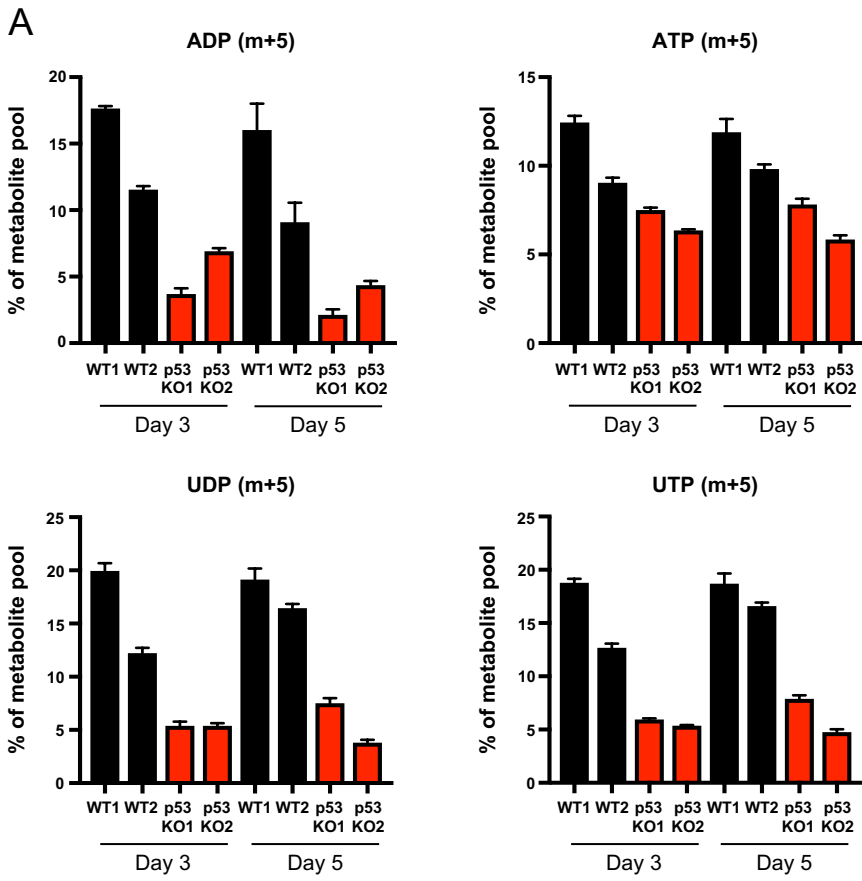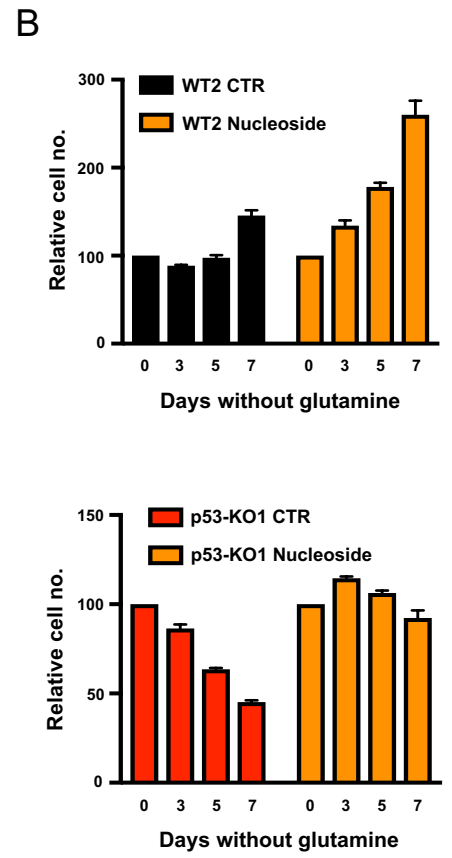

**Figure S2 (related to Figure 3): Nucleotide synthesis is impaired in p53-null cells under glutamine deprivation.**

- A. HCT116 isogenic cell clones were cultured in glutamine-deficient medium for 3 or 5 days and stable isotopomer tracing analysis with U-[<sup>13</sup>C]-glucose was performed. Metabolites were extracted and analyzed by LC-MS. Data presented as mean  $\pm$  SEM of triplicate wells.
- B. HCT116 isogenic cell clones grown in glutamine-deficient medium for 7 days were supplemented with or without a nucleoside mix. Total cell numbers were counted regularly. Data are presented as mean  $\pm$  SEM of one representative experiment (averages of triplicate wells).

A

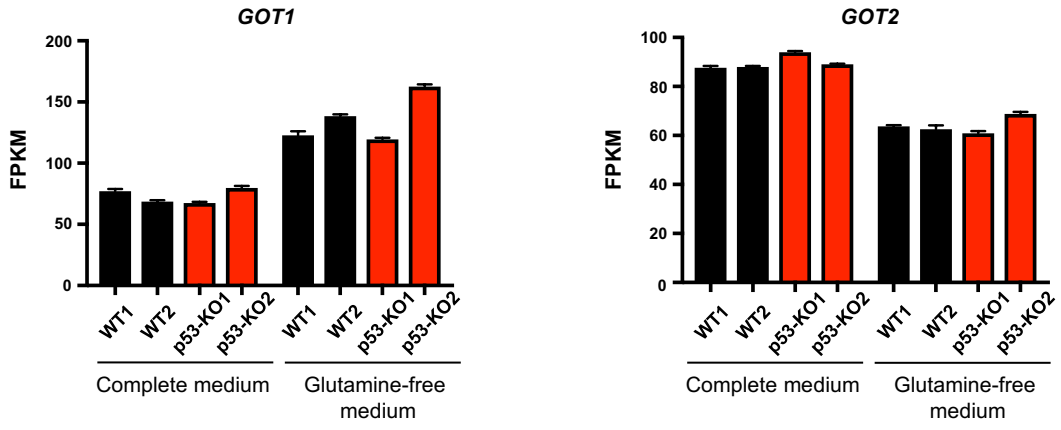

B

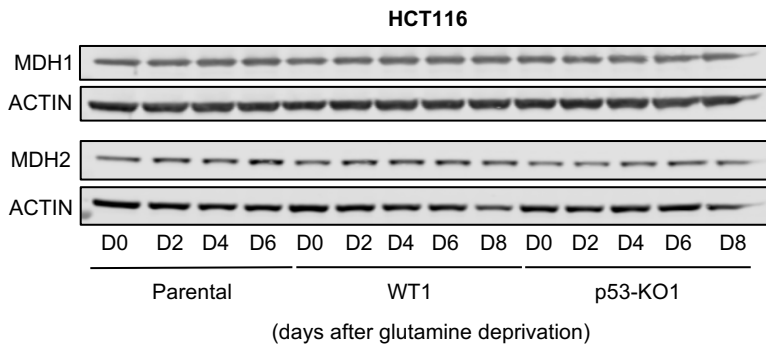

**Figure S3 (related to Figure 3): Expression of *GOT1/2* and MDH1/2 in p53 wild type and null cells under glutamine deprivation.**

- A. Transcriptional expression of *GOT1* (left) and *GOT2* (right) in HCT116 WT and p53-null clones grown for 2 days in complete medium or in glutamine-free medium. Data are presented as mean  $\pm$  SEM (averages of triplicate wells).
- B. Western blots show MDH1 and MDH2 expression in HCT116 parental, WT and p53-null clones cultured for 0, 2, 4, 6 or 8 days in glutamine-free condition.

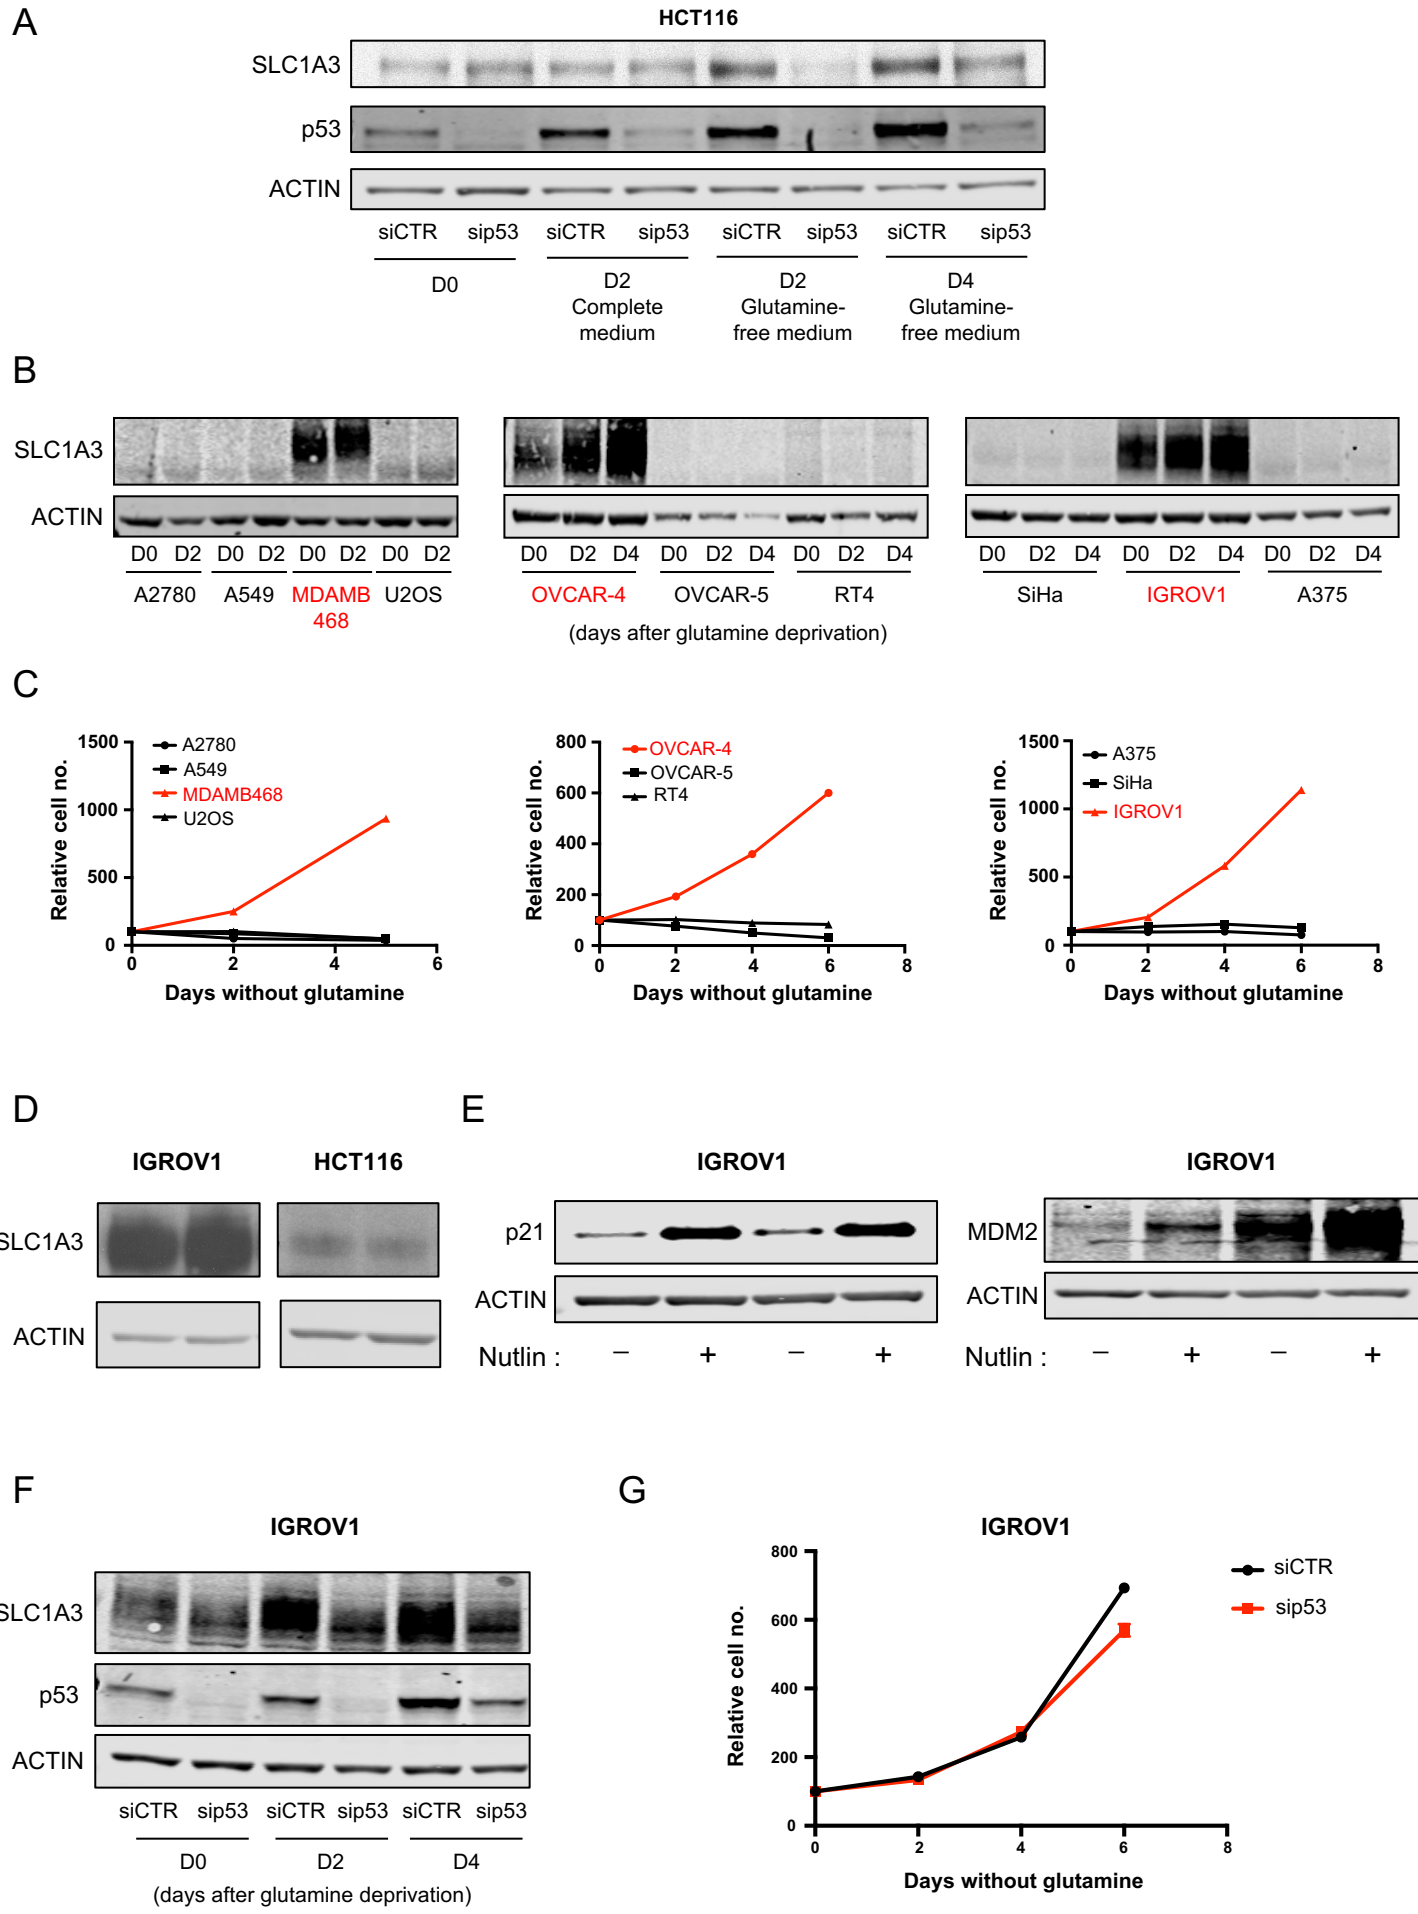



**Figure S4 (related to Figure 4): SLC1A3 expression in human cancer cell lines.**

- A. p53 was transiently knocked down in HCT116 parental cells using siRNA and cultured for 2 days in complete medium or for 2 and 4 days in glutamine-free medium. Western blots show SLC1A3 and p53 expression over time.
- B. Western blots show the expression of SLC1A3 in cell lines derived from diverse cancer types and grown for 0, 2 or 4 days in glutamine-free medium.
- C. Proliferation rates of tumor cell lines cultured for 6 days in glutamine-free medium. Data are presented as mean  $\pm$  SEM (averages of triplicate wells).
- D. Western blots showing SLC1A3 expression in IGROV1 and HCT116 cells grown in complete medium.
- E. Western blots showing expression of p21 and MDM2, both products of p53-responsive genes, in IGROV1 cells treated with Nutlin (10  $\mu$ M) for 24 hours.
- F. p53 was transiently depleted from IGROV1 cells using siRNA and cultured for 0, 2 or 4 days in glutamine-free medium. Western blots show SLC1A3 and p53 expression over time.
- G. Proliferation of IGROV1 cells transiently depleted of p53 using siRNA and cultured for 6 days in glutamine-free medium. Data are presented as mean  $\pm$  SEM of one representative experiment (averages of triplicate wells).

A

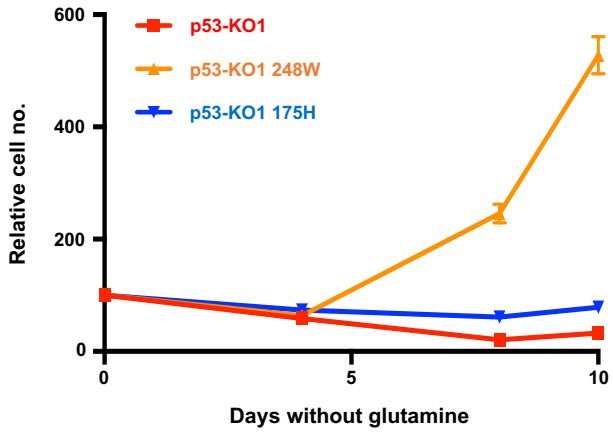

B

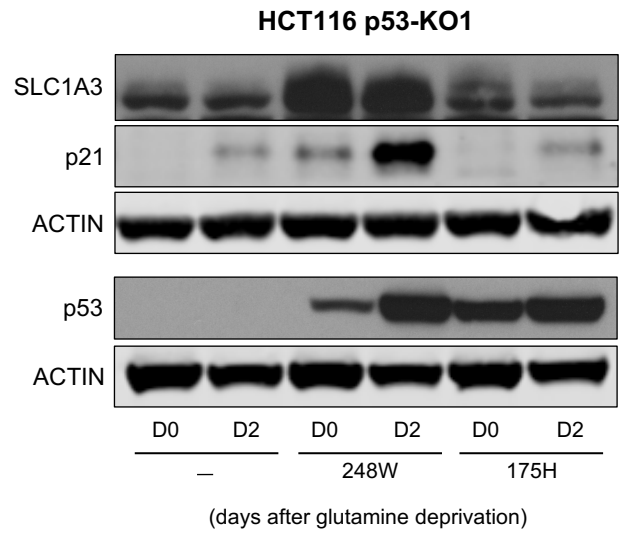

C

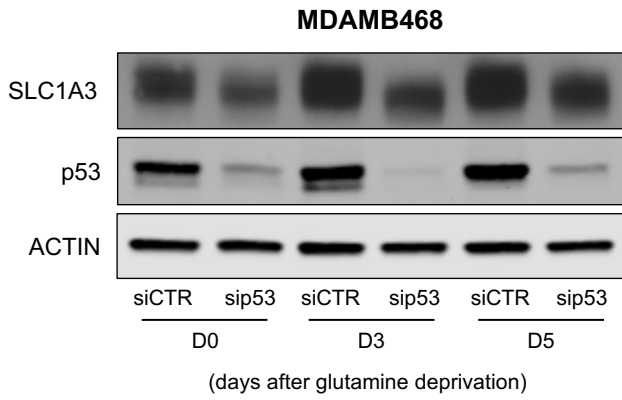

**Figure S5 (related to Figure 4): Rescue of growth under glutamine starvation and SLC1A3 expression by tumor derived p53 mutants.**

- A. p53 mutants 248W and 175H were stably expressed in p53-KO1 HCT116 cells and these cell lines were grown in glutamine-free condition for 10 days. Data are presented as mean  $\pm$  SEM of one representative experiment (averages of triplicate wells).
- B. Representative western blots showing expression of SLC1A3, p21 and p53 in p53-KO1 HCT116 cells expressing or not p53 mutants, cultured for 0 or 2 days in glutamine-free condition.
- C. p53 was transiently depleted from MDA-MB-468 cells using siRNA and cultured for 0, 3 or 5 days in glutamine-free medium. Western blots show SLC1A3 and p53 expression over time.

A

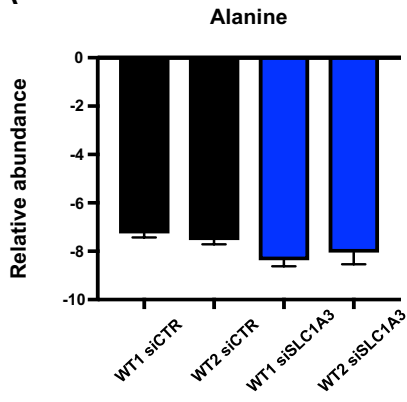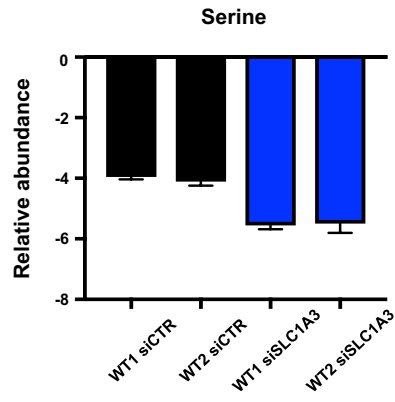

B

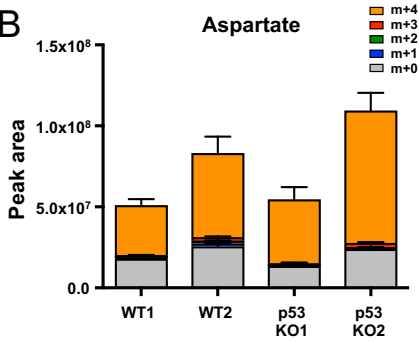

C

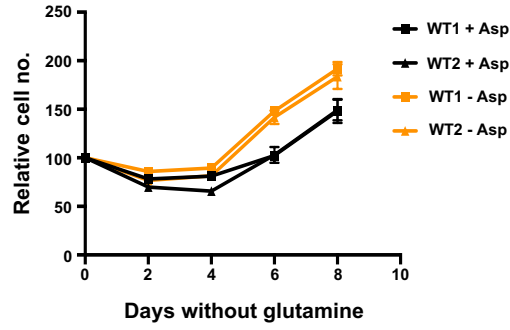

D

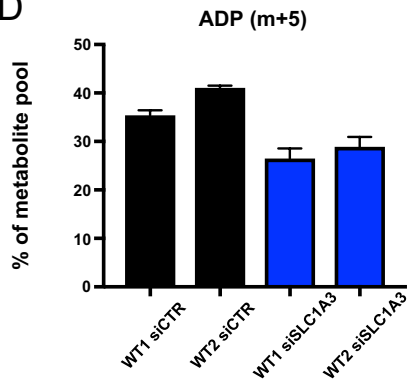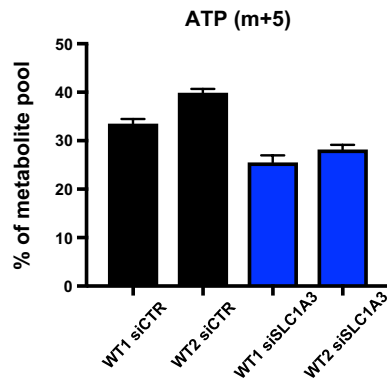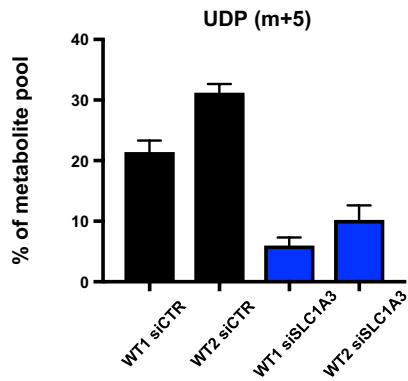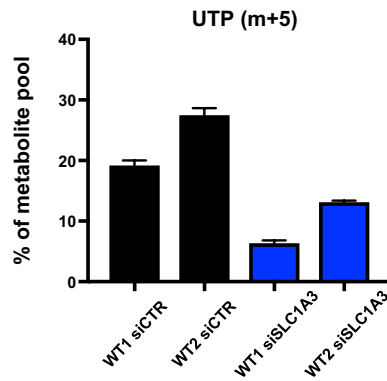

**Figure S6 (related to Figure 5): The effect of SLC1A3 downregulation on amino acid uptake and nucleotide synthesis under glutamine starvation.**

- A. HCT116 WT cells transiently depleted of SLC1A3 using siRNA were grown for 2 days in glutamine-free medium and pulsed with U-[<sup>13</sup>C]-aspartate for the final 24 hours. Extracellular levels of alanine and serine normalized to cell number, were quantified over 24 hours and analyzed by LC-MS. Data are presented as mean ± SEM of one representative experiment (averages of triplicate wells).
- B. Stable isotopomer tracing analysis of U-[<sup>13</sup>C]-aspartate incorporation into cells in HCT116 WT and p53-null cells under glutamine starvation. Data are presented as mean ± SEM of one representative experiment (averages of triplicate wells).
- C. HCT116 WT cells were grown for 8 days in glutamine-free medium with or without aspartate (0.15 mM). Data are presented as mean ± SEM of one representative experiment (averages of triplicate wells).
- D. HCT116 WT cells transiently depleted of SLC1A3 using siRNA were grown for 2 days in glutamine-free medium and pulsed with U-[<sup>13</sup>C]-glucose for the final 16 hours. Metabolites were extracted and analyzed by LC-MS. Data are presented as mean ± SEM of one representative experiment (averages of triplicate wells).

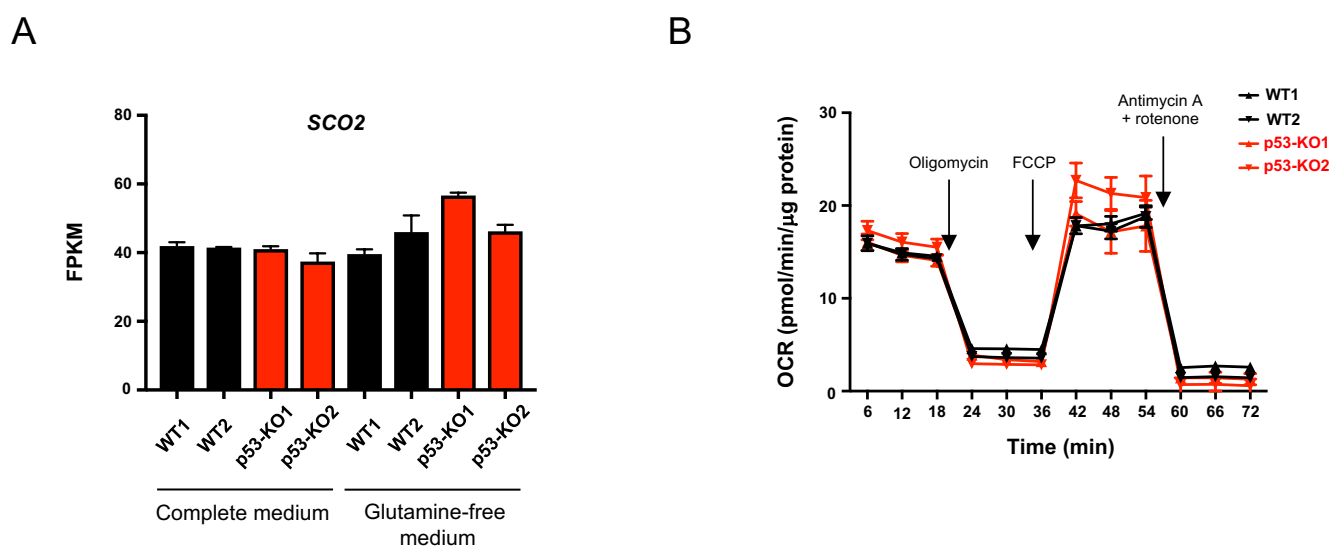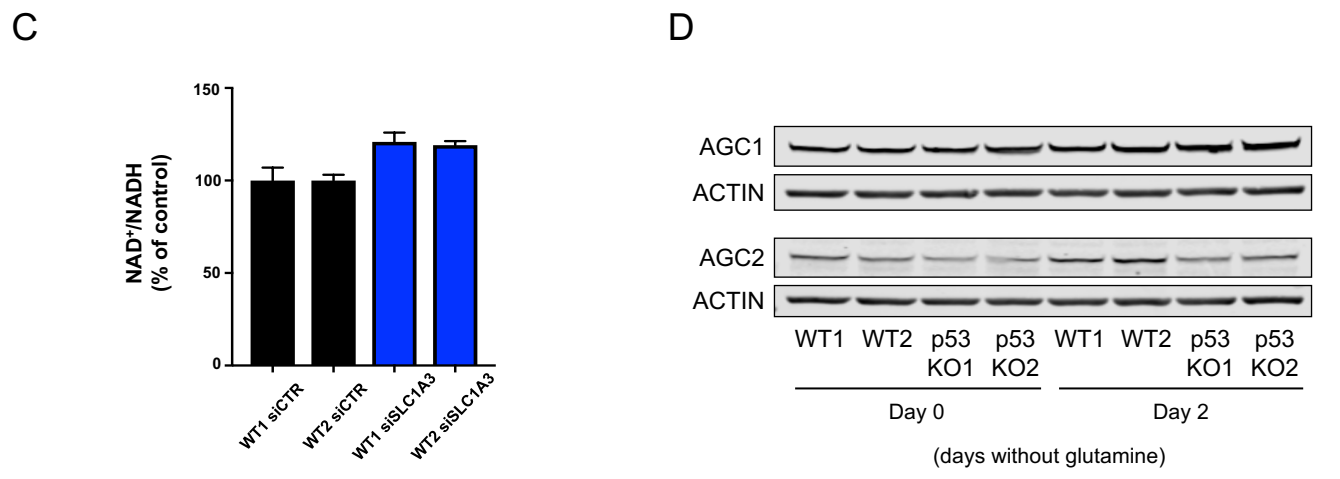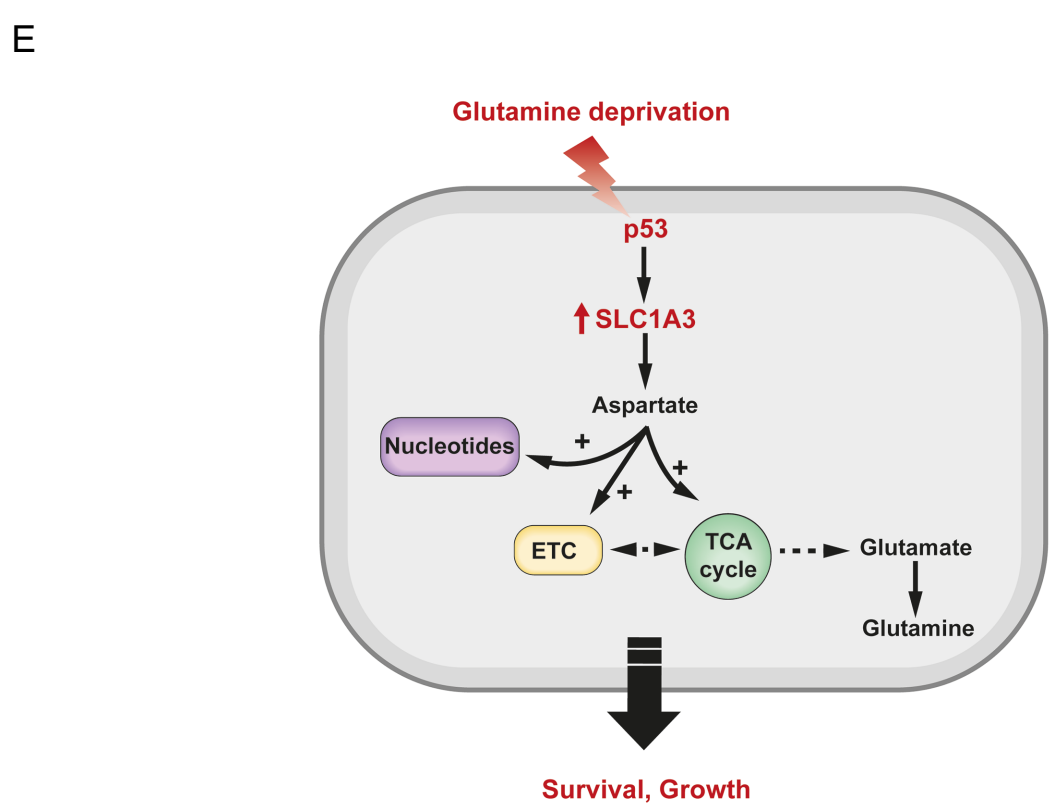

**Figure S7 (related to Figure 6): Impact of p53 and SLC1A3 on mitochondrial respiration.**

- A. Transcriptional expression of *SCO2* in HCT116 WT and p53-null clones grown for 2 days in complete medium or in glutamine-free medium. Data are presented as mean  $\pm$  SEM (averages of triplicate wells).
- B. Oxygen consumption rates (OCR) of HCT116 clones grown in complete media following the addition of mitochondrial inhibitors (oligomycin, FCCP, antimycin A & rotenone). Arrows indicate incubation of cells with the indicated compounds. Data are presented as mean  $\pm$  SEM of one representative experiment (n=6 wells).
- C. HCT116 WT cells transiently depleted of SLC1A3 using siRNA were grown for 2 days in glutamine-free medium and pulsed with U-<sup>13</sup>C]-aspartate for 16 hours. NAD<sup>+</sup>/NADH ratio, expressed as a percentage of the control cells, was measured by LC-MS in cells fed glutamine-free medium. Data are presented as mean  $\pm$  SEM of one representative experiment (averages of triplicate wells).
- D. Western blots show AGC1 and AGC2 expression in HCT116 WT clones and p53-null clones grown for two days in glutamine-free medium.  
  
*Note, AGC2 and SLC1A3 (Figure 4B) were probed on the same membrane so the same ACTIN western blot is shown in Figure S7D and 4B.*
- E. Glutamine starvation induces a transient activation of p53 that is necessary to sustain the expression of the glutamate/aspartate transporter SLC1A3. SLC1A3 expression promotes aspartate utilization to support nucleotide synthesis, ETC and TCA cycle activity and *de novo* synthesis of glutamate and glutamine. SLC1A3 can therefore promote survival and growth of cancer cells under conditions of glutamine limitation.
